# Supplementary material for: The Mockery of Tea : Reading of Tea scenes in Virginia Woolf's Novels
Source: Royal Society of Chemistry journal article supplement (doi:10.1039/c6tb00237d), 2006-09-30
Supplement: c6tb00237d1.pdf [file c6tb00237d1.pdf]

Table S1

Sol-gel transition temperature ( $T_{gel}$ ) of bulk poloxamer gel determined by the stirring method.

| Concentration of P407 (% w/w) | $T_{gel}$ (°C) |
|-------------------------------|----------------|
| 15.0                          | $37.7 \pm 0.2$ |
| 17.5                          | $30.3 \pm 0.1$ |
| 20.0                          | $25.8 \pm 0.1$ |
| 22.5                          | $23.9 \pm 0.2$ |
| 25.0                          | $22.4 \pm 0.1$ |
| 27.5                          | $19.9 \pm 0.2$ |

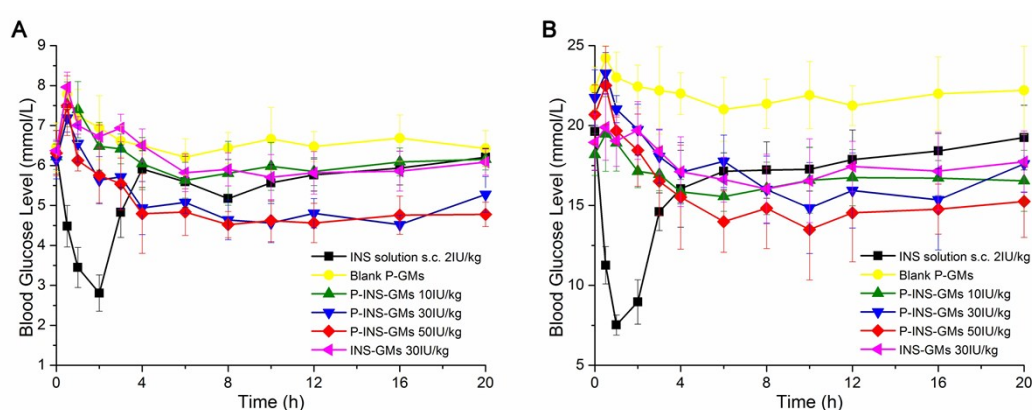

Fig. S1 The blood glucose level after oral administration of different INS-loaded formulations in normal (A) and diabetic (B) rats.

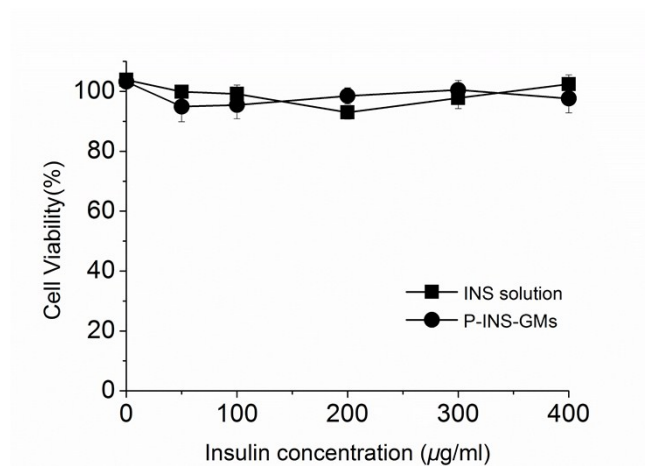

Fig. S2. Cell viability of caco-2 cells after incubation with P-INS-GMs within insulin concentration range of 50-400 µg/mL.
